# Supplementary material
Source: Springer Nature journal article supplement (https://mijn.bsl.nl/resource/supplementary/13047_2009_96_MOESM5_ESM.pdf/7109684)

**Normal-arched foot**

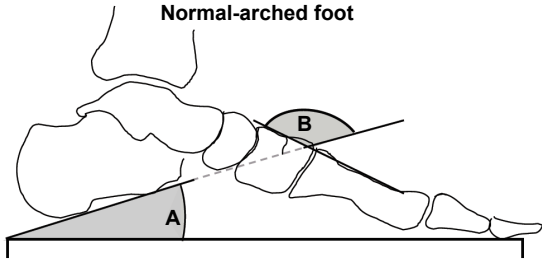

**Flat-arched foot**

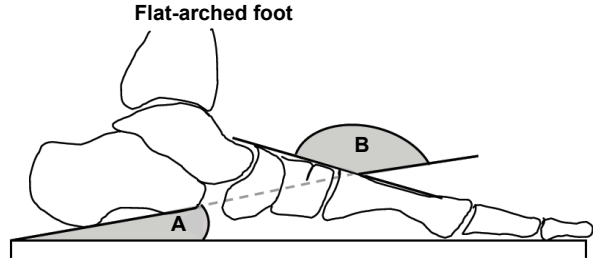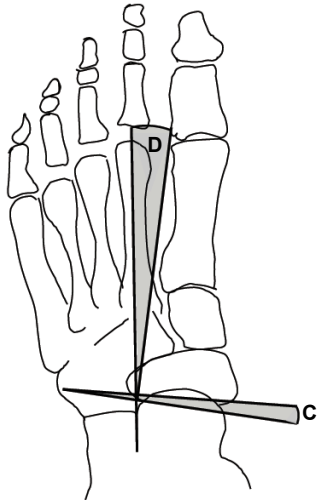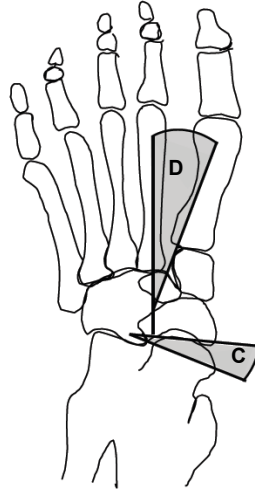

Supplement: MOESM5 [file 7109684]
